# Supplementary material
Source: MDPI journal article supplement (https://www.mdpi.com/2311-7524/9/7/832)
Supplement: s1 [file s1]

### Supplementary Information

The outer scales were removed from bulb segments with the help of a blade and cleaning of bulb segments was undertaken step by step with different commercial detergents and surfactants, like Teepol, cetramide, Tween 20, and 5% sodium hypochlorite. Before inoculation, the bulb segments were surface sterilized in a laminar hood with 70% ethanol and 0.2% mercuric chloride, followed by washing with autoclaved distilled water three times. Four different sterilization treatments (ST1–ST4) were used with different combinations and durations of treatments. To improve clarity, we have added a table containing the different combinations of surfactants and chemical treatments used for explant sterilization.

**Supplementary Table S1: Effects of various surface disinfectants on sterilization of explants.**

| <b>Sterilization Treatment Number</b> | <b>Disinfectants Used/ Surface Sterilization Detergents</b>    |                                                       | <b>No. of Explants Tested</b> | <b>No. of Explants that Survived</b> |
|---------------------------------------|----------------------------------------------------------------|-------------------------------------------------------|-------------------------------|--------------------------------------|
| ST1                                   | Teepol + cetramide washing                                     | 70% ethanol (3 min) + 0.1% HgCl <sub>2</sub> (2 min)  | 72                            | 32                                   |
| ST2                                   | Teepol + cetramide washing + Tween 20                          | 70% ethanol (4 min) + 0.1% HgCl <sub>2</sub> (3 min)  | 72                            | 43                                   |
| ST3                                   | Teepol + cetramide washing + Tween 20 + 2% sodium hypochlorite | 70% ethanol (4 min) + 0.1% HgCl <sub>2</sub> (5 min)  | 72                            | 66                                   |
| ST4                                   | Teepol + cetramide washing + Tween 20 + 5% sodium hypochlorite | 70% ethanol (5 min) + 0.1% HgCl <sub>2</sub> ( 6 min) | 72                            | 72                                   |

**Supplementary Table S2: Accumulation of sugar content (mg g<sup>-1</sup> FW) in bulb, leaf, and root parts of *Zephyranthes candida* with different methyl jasmonate treatments.**

| Plant Parts Used | T0            | T1            | T2            | T3            | T4            |
|------------------|---------------|---------------|---------------|---------------|---------------|
| <b>Bulb</b>      | 12.56 ± 0.02e | 13.02 ± 0.01d | 13.56 ± 0.02c | 14.56 ± 0.05b | 18.06 ± 0.05a |
| <b>Leaf</b>      | 8.54 ± 0.04e  | 9.28 ± 0.02d  | 9.54 ± 0.02c  | 9.42 ± 0.03b  | 10.02 ± 0.01a |
| <b>Root</b>      | 6.23 ± 0.01e  | 6.56 ± 0.02d  | 6.96 ± 0.01c  | 7.44 ± 0.03b  | 7.54 ± 0.03a  |

Values are means ± standard deviation of three experiments. Mean values in the columns followed by different letters were significantly different (at  $p = 0.05$ ) according to DMRT.

T0 = control, T1= 50 µM, T2 =100 µM, T3 = 150 µM, and T4 = 200 µM.

**Supplementary Table S3. Accumulation of sugar content (mg g<sup>-1</sup> FW) in bulb, leaf, and roots parts of *Zephyranthes grandiflora* with different methyl jasmonate treatments.**

| Plant Parts Used | T0            | T1            | T2            | T3            | T4            |
|------------------|---------------|---------------|---------------|---------------|---------------|
| <b>Bulb</b>      | 13.02 ± 0.02e | 13.76 ± 0.04d | 13.98 ± 0.04c | 14.56 ± 0.05b | 17.56 ± 0.05a |
| <b>Leaf</b>      | 8.54 ± 0.04e  | 8.88 ± 0.02d  | 9.02 ± 0.02c  | 9.36 ± 0.05b  | 9.76 ± 0.02a  |
| <b>Root</b>      | 5.65± 0.01e   | 5.44 ± 0.01d  | 5.97 ± 0.01c  | 6.22 ± 0.01b  | 6.34 ± 0.03a  |

Values are means ± standard deviation of three experiments. Mean values in the bars followed by different letters were significantly different (at  $p = 0.05$ ) according to DMRT.

T0 = control, T1 = 50 µM, T2 =100 µM, T3 = 150 µM, and T4 = 200 µM.

**Supplementary Table S4. Accumulation of sugar content (mg g<sup>-1</sup> FW) in bulb, leaf, and roots parts of *Zephyranthes citrina* with different methyl jasmonate treatments.**

| Plant Parts Used | T0 | T1 | T2 | T3 | T4 |
|------------------|----|----|----|----|----|
|------------------|----|----|----|----|----|

|             |              |              |              |               |               |
|-------------|--------------|--------------|--------------|---------------|---------------|
| <b>Bulb</b> | 9.76 ± 0.02e | 12.6 ± 0.04d | 13.5 ± 0.04c | 13.56 ± 0.04b | 14.04 ± 0.05a |
| <b>Leaf</b> | 5.27 ± 0.04e | 7.2 ± 0.04d  | 7.8 ± 0.03c  | 7.92 ± 0.03b  | 8.2 ± 0.02a   |
| <b>Root</b> | 4.34 ± 0.02e | 4.5 ± 0.01d  | 5.2 ± 0.03c  | 6.22 ± 0.01b  | 6.77 ± 0.07a  |

Values are means ± standard deviation of three experiments. Mean values in the bars followed by different letters were significantly different (at  $p = 0.05$ ) according to DMRT.

T0 = control, T1 = 50 µM, T2 = 100 µM, T3 = 150 µM, and T4 = 200 µM.

**Supplementary Table S5. Accumulation of proline content (mg g<sup>-1</sup> FW) in bulb, leaf, and roots parts of *Zephyranthes candida* with different methyl jasmonate treatments.**

| <b>Plant Parts Used</b> | <b>T0</b>    | <b>T1</b>    | <b>T2</b>    | <b>T3</b>    | <b>T4</b>    |
|-------------------------|--------------|--------------|--------------|--------------|--------------|
| <b>Bulb</b>             | 5.63 ± 0.03e | 6.02 ± 0.04d | 6.54 ± 0.04c | 7.05 ± 0.04b | 7.42 ± 0.05a |
| <b>Leaf</b>             | 4.56 ± 0.03e | 4.77 ± 0.02d | 5.01 ± 0.02c | 5.45 ± 0.05b | 5.78 ± 0.04a |
| <b>Root</b>             | 3.04 ± 0.01e | 3.56 ± 0.01d | 3.64 ± 0.02c | 3.72 ± 0.01b | 3.81 ± 0.01a |

Values are means ± standard deviation of three experiments. Mean values in the bars followed by different letters were significantly different (at  $p = 0.05$ ) according to DMRT.

T0 = control, T1 = 50 µM, T2 = 100 µM, T3 = 150 µM, and T4 = 200 µM.

**Supplementary Table S6. Accumulation of proline content (mg g<sup>-1</sup> FW) in bulb, leaf, and roots parts of *Zephyranthes grandiflora* with different methyl jasmonate treatments.**

| <b>Plant Parts Used</b> | <b>T0</b>    | <b>T1</b>    | <b>T2</b>    | <b>T3</b>    | <b>T4</b>    |
|-------------------------|--------------|--------------|--------------|--------------|--------------|
| <b>Bulb</b>             | 4.63 ± 0.01e | 4.98 ± 0.04d | 5.2 ± 0.04c  | 5.32 ± 0.07b | 5.55 ± 0.05a |
| <b>Leaf</b>             | 4.34 ± 0.05e | 4.55 ± 0.03d | 4.67 ± 0.05c | 4.82 ± 0.03b | 4.9 ± 0.04a  |

|             |              |              |              |              |              |
|-------------|--------------|--------------|--------------|--------------|--------------|
| <b>Root</b> | 3.01 ± 0.01e | 3.42 ± 0.03d | 3.55 ± 0.01c | 3.60 ± 0.01b | 3.75 ± 0.01a |
|-------------|--------------|--------------|--------------|--------------|--------------|

Values are means ± standard deviation of three experiments. Mean values in the bars followed by different letters were significantly different (at  $p = 0.05$ ) according to DMRT.

T0 = control, T1 = 50 µM, T2 =100 µM, T3 = 150 µM, and T4 = 200 µM.

**Supplementary Table S7. Accumulation of proline content (mg g<sup>-1</sup> FW) in bulb, leaf, and roots parts of *Zephyranthes citrina* with different methyl jasmonate treatments.**

| <b>Plant Parts Used</b> | <b>T0</b>     | <b>T1</b>    | <b>T2</b>    | <b>T3</b>    | <b>T4</b>    |
|-------------------------|---------------|--------------|--------------|--------------|--------------|
| <b>Bulb</b>             | 3.27 ± 0.035e | 3.56 ± 0.04d | 3.98 ± 0.05c | 4.05 ± 0.04b | 4.24 ± 0.04a |
| <b>Leaf</b>             | 2.34 ± 0.02e  | 2.55 ± 0.03d | 2.67 ± 0.04c | 2.70 ± 0.03b | 2.83 ± 0.03a |
| <b>Root</b>             | 1.54 ± 0.01e  | 1.65 ± 0.01d | 1.76 ± 0.02c | 1.83 ± 0.01b | 1.92 ± 0.03a |

Values are means ± standard deviation of three experiments. Mean values in the bars followed by different letters were significantly different (at  $p = 0.05$ ) according to DMRT.

T0 = control, T1 = 50 µM, T2 =100 µM, T3 = 150 µM, and T4 = 200 µM.

**Supplementary Table S8. Accumulation of protein content (mg g<sup>-1</sup> FW) in bulb, leaf, and roots parts of *Zephyranthes candida* with different methyl jasmonate treatments.**

| <b>Plant Parts Used</b> | <b>T0</b>    | <b>T1</b>    | <b>T2</b>    | <b>T3</b>    | <b>T4</b>    |
|-------------------------|--------------|--------------|--------------|--------------|--------------|
| <b>Bulb</b>             | 3.56 ± 0.03e | 3.82 ± 0.04d | 4.56 ± 0.04c | 5.23 ± 0.04b | 6.22 ± 0.03a |
| <b>Leaf</b>             | 2.98 ± 0.02e | 3.23 ± 0.04d | 3.85 ± 0.02c | 4.67 ± 0.01b | 5.05 ± 0.02a |
| <b>Root</b>             | 2.01 ± 0.01e | 2.54 ± 0.01d | 2.6 ± 0.01c  | 2.98 ± 0.01b | 3.19 ± 0.01a |

Values are means ± standard deviation of three experiments. Mean values in the bars followed by different letters were significantly different (at  $p = 0.05$ ) according to DMRT.

T0 = control, T1 = 50 µM, T2 =100 µM, T3 = 150 µM, and T4 = 200 µM.

**Supplementary Table S9. Accumulation of protein content (mg g<sup>-1</sup> FW) in bulb, leaf, and roots parts of *Zephyranthes grandiflora* with different methyl jasmonate treatments.**

| Plant Parts Used | T0           | T1           | T2           | T3           | T4           |
|------------------|--------------|--------------|--------------|--------------|--------------|
| <b>Bulb</b>      | 3.72 ± 0.03e | 3.96 ± 0.01d | 4.98 ± 0.04c | 5.13 ± 0.04b | 6.45 ± 0.05a |
| <b>Leaf</b>      | 3.41 ± 0.02e | 3.62 ± 0.03d | 3.85 ± 0.02c | 4.56 ± 0.05b | 5.05 ± 0.06a |
| <b>Root</b>      | 2.13 ± 0.01e | 2.54 ± 0.01d | 2.6 ± 0.02c  | 3.67 ± 0.01b | 4.03 ± 0.01a |

Values are means ± standard deviation of three experiments. Mean values in the bars followed by different letters were significantly different (at  $p = 0.05$ ) according to DMRT.

T0 = control, T1 = 50 µM, T2 = 100 µM, T3 = 150 µM, and T4 = 200 µM.

**Supplementary Table S10. Accumulation of protein content (mg g<sup>-1</sup> FW) in bulb, leaf, and roots parts of *Zephyranthes citrina* with different methyl jasmonate treatments.**

| Plant Parts Used | T0           | T1           | T2           | T3           | T4           |
|------------------|--------------|--------------|--------------|--------------|--------------|
| <b>Bulb</b>      | 2.78 ± 0.03e | 2.98 ± 0.01d | 3.05 ± 0.04c | 4.05 ± 0.04b | 4.67 ± 0.05a |
| <b>Leaf</b>      | 2.55 ± 0.04e | 2.76 ± 0.03d | 3.21 ± 0.05c | 3.56 ± 0.03b | 4.03 ± 0.03a |
| <b>Root</b>      | 1.76 ± 0.02e | 2.54 ± 0.01d | 2.6 ± 0.02c  | 2.01 ± 0.02b | 2.57 ± 0.01a |

Values are means ± standard deviation of three experiments. Mean values in the bars followed by different letters were significantly different (at  $p = 0.05$ ) according to DMRT.

T0 = control, T1 = 50 µM, T2 = 100 µM, T3 = 150 µM, and T4 = 200 µM.
